# Supplementary material
Source: publisher site journal article supplement (https://www.dovepress.com/article/supplementary_file/602358/602358%20Revised%20Supplementary%20Materials.docx)
Supplement: Supplementary file 1 [file 602358%20Revised%20Supplementary%20Materials.docx]

**Supplementary Table 1: Results of Collinearity Diagnostics (VIF)**

| **Coefficient a** | | | | | | | | |
| --- | --- | --- | --- | --- | --- | --- | --- | --- |
| **Model** | | **Unstandardized Coefficients** | | **Standardized Coefficients** | **t** | ***P*** | **Collinearity Statistics** | |
| **B** | **Std. Error** | **Beta** | **Tolerance** | **VIF** |
| 1 | (Constant) | -0.413 | 0.115 |  | -3.575 | <0.001 |  |  |
| TyG | 0.023 | 0.008 | 0.058 | 2.692 | 0.007 | 0.936 | 1.068 |
| WHR | -0.011 | 0.165 | -0.002 | -0.068 | 0.946 | 0.384 | 2.603 |
| WHtR | 1.753 | 0.237 | 0.353 | 7.411 | <0.001 | 0.191 | 5.244 |
| BMI | -0.018 | 0.003 | -0.205 | -5.286 | <0.001 | 0.288 | 3.472 |
| Waist Circumference | -0.002 | 0.002 | -0.072 | -1.269 | 0.205 | 0.133 | 7.523 |

1. Dependent variable: PAD

Note: TyG, triglyceride–glucose index; WHR, waist-to-hip ratio index; WHtR, waist-to-height ratio index; BMI, body mass index; PAD, peripheral artery disease.

| **Variables** | **Subgroup variable** | ***P* for interaction** | ***P*test for interaction** | **Significant after correction (Yes/No)** |
| --- | --- | --- | --- | --- |
| TyG | Sex | 0.301 | 0.551 | No |
| TyG | Age | 0.053 | 0.177 | No |
| TyG | Smoking | 0.011 | 0.047 | Yes |
| TyG | Duration of diabetes | 0.387 | 0.602 | No |
| TyG | HbA1c | 0.563 | 0.755 | No |
| TyG | eGFR | 0.531 | 0.755 | No |
| TyG-WHtR | Sex | 0.008 | 0.040 | Yes |
| TyG-WHtR | Age | 0.088 | 0.256 | No |
| TyG-WHtR | Smoking | 0.004 | 0.030 | Yes |
| TyG-WHtR | Duration of diabetes | 0.312 | 0.551 | No |
| TyG-WHtR | HbA1c | 0.622 | 0.755 | No |
| TyG-WHtR | eGFR | 0.942 | 0.942 | No |
| TyG-WHR | Sex | 0.004 | 0.030 | Yes |
| TyG-WHR | Age | 0.035 | 0.131 | No |
| TyG-WHR | Smoking | 0.003 | 0.030 | Yes |
| TyG-WHR | Duration of diabetes | 0.401 | 0.602 | No |
| TyG-WHR | HbA1c | 0.672 | 0.766 | No |
| TyG-WHR | eGFR | 0.689 | 0.766 | No |
| TyG-WC | Sex | 0.005 | 0.030 | Yes |
| TyG-WC | Age | 0.094 | 0.256 | No |
| TyG-WC | Smoking | 0.003 | 0.030 | Yes |
| TyG-WC | Duration of diabetes | 0.357 | 0.595 | No |
| TyG-WC | HbA1c | 0.629 | 0.755 | No |
| TyG-WC | eGFR | 0.792 | 0.819 | No |
| TyG-BMI | Sex | 0.246 | 0.492 | No |
| TyG-BMI | Age | 0.177 | 0.408 | No |
| TyG-BMI | Smoking | 0.116 | 0.290 | No |
| TyG-BMI | Duration of diabetes | 0.206 | 0.441 | No |
| TyG-BMI | HbA1c | 0.581 | 0.755 | No |
| TyG-BMI | eGFR | 0.790 | 0.819 | No |

**Supplementary Table 2: Subgroup Analysis and Interaction Tests for the Associations Between TyG-related Indices and the Presence of PAD.**

Adjustments were made for sex, age, diabetes duration, smoking, SBP, DBP, HbA1c, LDL-C, HDL-C, eGFR, the use of insulin, oral hypoglycemic agents, statins, antiplatelet agents, and antihypertensive agents before stratification.
Note: TyG, triglyceride–glucose index; TyG-WHtR, triglyceride–glucose waist-to-height ratio index; TyG-WHR, triglyceride–glucose waist-to-hip ratio index; TyG-WC, triglyceride–glucose waist circumference index; TyG-BMI, triglyceride–glucose body mass index; HbA1c, glycated hemoglobin; eGFR, estimated glomerular filtration rate.

*P*test represents the Benjamini–Hochberg-adjusted *P* value (statistical significance defined as *P* < 0.05).

**Supplementary Table 3: Pairwise comparison of AUCs using DeLong’s test and Bonferroni Correction.**

| **Comparison Pair** | **Asymptotic** | | | **AUC Difference** | **Std. Error of Difference** | **Asymptotic 95% CI** | |
| --- | --- | --- | --- | --- | --- | --- | --- |
| **z** | ***P*** | ***P*test** | **Lower** | **Upper** |
| TyG - TyGWHtR | -3.933 | <0.001 | <0.001 | -0.064 | 0.200 | -0.096 | -0.032 |
| TyG - TyGWHR | -2.836 | 0.005 | 0.050 | -0.035 | 0.199 | -0.059 | -0.011 |
| TyG - TyGWC | -2.147 | 0.032 | 0.320 | -0.034 | 0.200 | -0.065 | -0.003 |
| TyG - TyGBMI | 1.046 | 0.295 | 1.000 | 0.019 | 0.202 | -0.017 | 0.056 |
| TyGWHtR- TyGWHR | 2.423 | 0.015 | 0.150 | 0.029 | 0.199 | 0.006 | 0.053 |
| TyGWHtR - TyGWC | 4.331 | <0.001 | <0.001 | 0.030 | 0.200 | 0.017 | 0.044 |
| TyGWHtR - TyGBMI | 7.348 | <0.001 | <0.001 | 0.084 | 0.202 | 0.061 | 0.106 |
| TyGWHR - TyGWC | 0.112 | 0.911 | 1.000 | 0.001 | 0.199 | -0.020 | 0.022 |
| TyGWHR - TyGBMI | 3.351 | 0.001 | 0.010 | 0.055 | 0.201 | 0.023 | 0.087 |
| TyGWC - TyGBMI | 4.764 | <0.001 | <0.001 | 0.053 | 0.202 | 0.031 | 0.075 |

TyG, triglyceride–glucose index; TyG-WHtR, triglyceride–glucose waist-to-height ratio index; TyG-WHR, triglyceride–glucose waist-to-hip ratio index; TyG-WC, triglyceride–glucose waist circumference index; TyG-BMI, triglyceride–glucose body mass index.

Note: Differences between AUCs were assessed using DeLong’s test. A total of 10 pairwise comparisons were performed, and Bonferroni correction was applied for multiple testing; *P*test was the result of Bonferroni correction (statistical significance defined as *P* < 0.005).
